# Supplementary material
Source: MDPI journal article supplement (https://www.mdpi.com/2226-471X/4/4/85)
Supplement: s1 [file s1]

# Implied Consent

---

Instructions: Delete this paragraph once you have customized this document. **Blue text found throughout this document in boldface and brackets offers guidance and suggestions. Delete blue text once done.** Red text is sample statements that can be sculpted according to your study. Black text is the formatting that does not need to change. The following paragraphs should go at the top of the survey you give/send out. It can be smaller font than the survey. Please adapt it to your own project, in terms of your department or college, what the research is and why these people have been asked to participate. Please note that if you are using this template for an online consent, revise the text accordingly.

My name is \_\_\_\_\_, I am a [graduate/undergraduate] student at Brigham Young University and I am conducting this research under the supervision of [Professor \_\_\_\_\_, from the Department of \_\_\_\_\_]. You are being invited to participate in this research study of [list study name]. I am interested in finding out about [insert purpose of the survey/questionnaire].

Your participation in this study will require the completion of the attached [questionnaire/survey]. This should take approximately [number of minutes] minutes of your time. Your participation will be anonymous and you will not be contacted again in the future. You will not be paid for being in this study. This survey involves minimal risk to you. The benefits, however, may impact society by helping increase knowledge about [study topic].

You do not have to be in this study if you do not want to be. You do not have to answer any question that you do not want to answer for any reason. We will be happy to answer any questions you have about this study. If you have further questions about this project or if you have a research-related problem you may contact me, [researcher's name] at [contact information] or my advisor, [advisor's name] at [advisor's contact information].

If you have any questions about your rights as a research participant you may contact the IRB Administrator at A-285 ASB, Brigham Young University, Provo, UT 84602; irb@byu.edu; (801) 422-1461. The IRB is a group of people who review research studies to protect the rights and welfare of research participants.

The completion of this survey implies your consent to participate. If you choose to participate, please complete the attached survey and return it by [return date]. Thank you!
